# Supplementary material for: Amine-Terminated Modified Succinic Acid-Magnetite Nanoparticles for Effective Removal of Malachite Green Dye from Aqueous Environment
Source: MDPI journal article supplement (doi:10.3390/cryst13091301), 2023-08-24
Supplement: s1 [file s1]

## Supplementary Information

### Amine-terminated modified succinic acid-magnetite nanoparticles for effective removal of malachite green dye from aqueous environment

Saad Melhi

Department of Chemistry, College of Science, University of Bisha, Bisha, 61922, Saudi Arabia  
(saadmelhi@ub.edu.sa)

#### Table of contents

| Index   | Caption             |
|---------|---------------------|
| Text S1 | Adsorption isotherm |
| Text S2 | Adsorption kinetic  |

#### Text S1. Adsorption isotherm

To specify the maximum adsorption capacity of MSA@TEPA toward MG dye and also to study the mechanism of binding between MG dye and MSA@TEPA, nonlinear isotherm, Langmuir [1] Eq. S1, Freundlich [2] Eq. S2, and Dubinin–Radushkevich (D-R) [3] (Eq. S3–S5) isotherm models were used.

$$q_e = \frac{q_m K_L C_e}{1 + K_L C_e} \quad (S1)$$

$$q_e = K_F C_e^{1/n} \quad (S2)$$

$$q_e = q_m e^{-K_{D-R} \varepsilon^2} \quad (S3)$$

$$\varepsilon = RT \ln \left( 1 + \frac{1}{C_e} \right) \quad (S4)$$

$$E = \frac{1}{\sqrt{2K_{D-R}}} \quad (S5)$$

Here,  $K_{D-R}$  ( $\text{mol}^2/\text{kJ}^2$ ) is the D-R constant relating to adsorption energy, while  $K_L$  ( $\text{L}/\text{mg}$ ) is the Langmuir binding constant.  $K_F$  is the Freundlich constant ( $\text{mg}^{1-n} \cdot \text{L}/\text{g}$ );  $C_e$  is the concentration of MG dye ( $\text{mg}/\text{L}$ ) at equilibrium;  $n$  is the heterogeneity factor;  $E$  ( $\text{kJ}/\text{mol}$ ) is the activation energy, and  $\varepsilon$  is the Polanyi potential.

#### Text S2. Adsorption kinetic

To understand the MG adsorption mechanism on the MSA@TEPA surface, the experimental data were assessed using nonlinear kinetic models: pseudo-first-order (PFO) [4] Eq. S6, pseudo-second-order (PSO) Eq. S7, and Elovich [5] Eq. S8.

$$q_t = q_e (1 - e^{-k_1 t}) \quad (S6)$$

$$q_t = \frac{q_e^2 k_2 t}{1 + q_e k_2 t} \quad (S7)$$

$$q_t = \frac{1}{\beta} \ln(1 + \alpha \beta t) \quad (S8)$$

where  $q_e$  and  $q_t$  are the adsorption capacities ( $\text{mg}/\text{g}$ ) at equilibrium and at time  $t$  (min), respectively;  $k_1$  and  $k_2$  the constants for PFO and PSO models, respectively,  $\alpha$  ( $\text{mg}/\text{g} \cdot \text{min}$ ) is the initial adsorption rate;  $\beta$  ( $\text{mg}/\text{g}$ ) is the desorption constant during any one experiment.

#### References:

- Wallis, A.; Dollard, M.F. Local and global factors in work stress - The Australian dairy farming exemplar. *Scand J Work Environ Heal Suppl* **2008**, *66*, 66–74.
- Über die Adsorption in Lösungen. *Zeitschrift für Phys Chemie* **1907**, *57U*, 385.
- Dubinin, M.M. and R. The Equation of the Characteristic Curve of Activated Charcoal. *Proceedings of the Academy of Sciences. Phys Chem Sect* **1947**, *55*, 331.
- Lagergren, S. About the theory of so-called adsorption of soluble substances. *Handlingar* **1898**, *24*, 1–39.
- S. H. Chien and W. R. Clayton The catalytic oxidation of carbon monoxide on manganese dioxide. *Sci Soc Am J* **1980**, *44*, 265–268.
